# Supplementary material for: Altered levels of hsromega lncRNAs further enhance Ras signaling during ectopically activated Ras induced R7 differentiation in Drosophila
Source: bioRxiv or medRxiv preprint supplement (doi:10.1101/224543), 2019-04-12
Supplement: Supplementary file [file 224543-1.pdf]

**Supplementary Material**

**M. Ray & S. C. Lakhota: Altered *hsr $\omega$*  lncRNA levels in activated Ras background further enhance Ras activity in *Drosophila* eye and induces more R7 photoreceptors**

**Table S1.** Forward and reverse primers used for qRT-PCR/semi quantitative RT-PCR for quantification of different transcripts

| Transcripts and Primers |                                  | SEQUENCE (5'-3')            | AMPLICON SIZE |
|-------------------------|----------------------------------|-----------------------------|---------------|
| <b>g3pdh</b>            | Reverse                          | GGGTGCTTAATCCCACAGAA        | <b>129bp</b>  |
|                         | Forward1                         | AGGCGTTTGTGACTTCTGGA        |               |
| <b>g3pdh</b>            | Reverse1                         | TGTCCCTCCAGACCCCTTGTTTC     | <b>144bp</b>  |
|                         | Forward2                         | CCACTGCCGAGGAGGTCAACTA      |               |
| <b>sev</b>              | Forward (LP)                     | GGCAGACATACGTACACGTGGCAGCAT | <b>238 bp</b> |
|                         | hsr $\omega$ -n specific Reverse | TTGCGCTCACAGGAGATCAA        |               |
| <b>sos</b>              | Forward                          | AAGATGACCACCACCCACAT        | <b>161 bp</b> |
|                         | Reverse                          | CGCAGCAGATCGAGAGTAGA        |               |
| <b>Dsor</b>             | Forward                          | GAGCAACGGCCTACGACTAC        | <b>155 bp</b> |
|                         | Reverse                          | GTGCTTGTGCTGTGCATTCT        |               |
| <b>gap</b>              | Forward                          | CCACCCTGGAGTCGATATTC        | <b>123bp</b>  |
|                         | Reverse                          | GTCCTTGAACTCGGTGGAGA        |               |
| <b>rin</b>              | Forward                          | ATGCGTGTAACCCGCAAAG         | <b>174bp</b>  |
|                         | Reverse                          | TTTTGCACGCACTAGCAGAC        |               |
| <b>lz</b>               | Forward                          | TTTGCCTATTTTCGCAGACG        | <b>163 bp</b> |
|                         | Reverse                          | GACCATAGCTGGCGTTTGAT        |               |
| <b>kibra</b>            | Forward                          | CAGCCCATAGTGGGCATAGT        | <b>157 bp</b> |
|                         | Reverse                          | TGTTCCCTGTTGTGCTTCTG        |               |
| <b>dome</b>             | Forward                          | TACCTTGCCGGAAGCTAATC        | <b>173 bp</b> |
|                         | Reverse                          | GGTGGCTCTATGAGGGTGCT        |               |
| <b>E(Pc)</b>            | Forward                          | CTCACGTCTCGACTGGGAAC        | <b>193 bp</b> |
|                         | Reverse                          | CTAGCTGGAAGGGATTGTGG        |               |
| <b>hers</b>             | Forward                          | AGCCTCATCGACAACCACTC        | <b>185 bp</b> |
|                         | Reverse                          | ATCGTCCTCAGCTTCATCGT        |               |
| <b>Ras</b>              | Forward Normal                   | GGTCGTCGTTGGAGCCGG          | <b>242bp</b>  |
|                         | Forward Mutant                   | GGTCGTCGTTGGAGCCGT          |               |
|                         | Reverse                          | CACTGTTGACGGCAAAGACC        |               |

**Supplementary Material**

**M. Ray & S. C. Lakhotia: Altered *hsr $\omega$*  lncRNA levels in activated Ras background further enhance Ras activity in *Drosophila* eye and induces more R7 photoreceptors**

---

**Table S2.** The PCR conditions used for semi-quantitative RT- PCR

| <b>Gene</b>               | <b>Initial Denaturation</b> | <b>Denaturation</b> | <b>Annealing</b> | <b>Extension</b> | <b>No. of cycles</b> | <b>Final Extension</b> |
|---------------------------|-----------------------------|---------------------|------------------|------------------|----------------------|------------------------|
| <i>g3pdh</i>              | 3min at 94 °C               | 30 sec at 94 °C     | 30 sec at 60 °C  | 30 sec at 72 °C  | 30                   | 7 min at 72°C          |
| <i>Ras</i>                | 3 min at 94 °C              | 30 sec at 94 °C     | 30 sec at 63 °C  | 45 sec at 72 °C  | 30                   | 7 min at 72°C          |
| <i>Ras</i> <sup>V12</sup> | 3min at 94 °C               | 30 sec at 94 °C     | 30 sec at 63 °C  | 45 sec at 72 °C  | 30                   | 7 min at 72°C          |

Supplementary Material

M. Ray & S. C. Lakhota: Altered *hsrw* lncRNA levels in activated Ras background further enhance Ras activity in *Drosophila* eye and induces more R7 photoreceptors

Supplementary Figure S1.

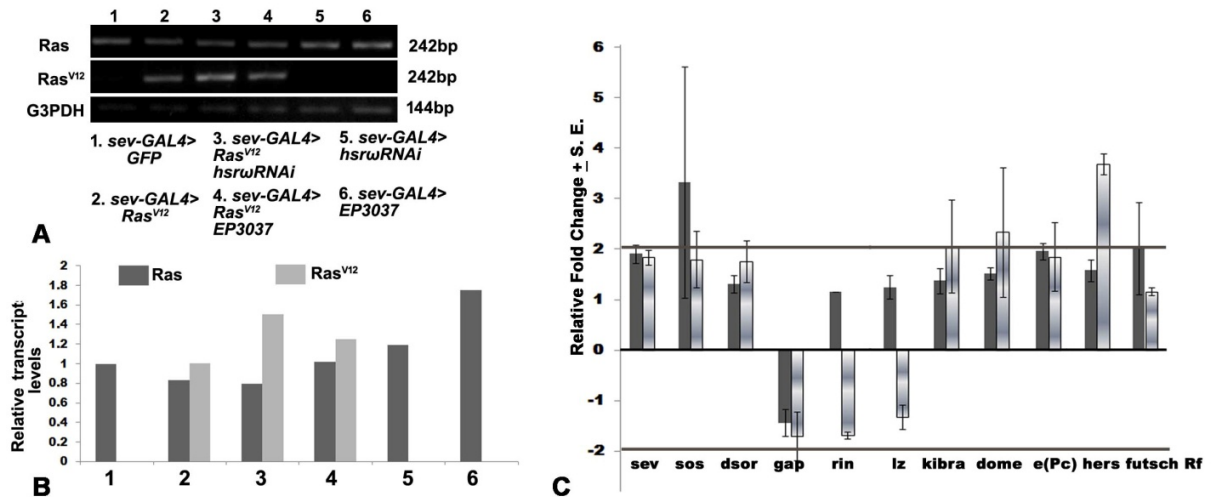

**Fig. S1.** Levels of transcripts of Ras signaling pathway genes remained unaltered in activated Ras background with either down- or up-regulation of *hsrw* transcripts. **A** Agarose gel images of RT-PCR amplicons to show levels of transcripts of endogenous *Ras*, activated *Ras<sup>V12</sup>* and *G3pdh* (internal control) in different genotypes (numbers at top of each lane and explained in the key provided at bottom). **B** Histogram showing relative levels (Y-axis) of endogenous *Ras* (dark grey) and transgenic activated *Ras<sup>V12</sup>* (light grey) transcripts compared to a reference gene (*G3pdh*) transcripts in third instar larval eye discs in different genotypes based on semi-quantitative RT-PCR (X-axis, key to the numbers is provided at the bottom of panel **A**). **C** Histogram showing real-time qRT-PCR based relative fold changes (Y-axis) in levels of transcripts of different genes (named on the X-axis) involved in Ras signaling cascade in *sev-GAL4>UAS-Ras<sup>V12</sup>UAS-hsrwRNAi* (dark grey) and *sev-GAL4>UAS-Ras<sup>V12</sup>EP3037* (light grey) eye discs compared to *sev-GAL4>UAS-Ras<sup>V12</sup>* eye discs..
